# Supplementary material
Source: PubMed Central journal article supplement (PMC4616946)
Supplement: AEM.01737-15_zam999116732so1.pdf [file AEM.01737-15_zam999116732so1.pdf]

## SUPPLEMENTARY ONLINE INFORMATION

### **Patterns of endemism and niche adaptation in coalbed microbial communities**

Christopher E. Lawson<sup>1,3,5\*</sup>, Cameron R. Strachan<sup>1,3\*</sup>, Dominique D. Williams<sup>1</sup>, Susan Koziel<sup>2</sup>, Steven J. Hallam<sup>1,3,4</sup>, Karen Budwill<sup>2†</sup>

\*These authors contributed equally to the work.

<sup>1</sup>MetaMixis Inc., Vancouver, Canada

<sup>2</sup>Environment and Carbon Management Division, Alberta Innovates - Technology Futures, Edmonton, Canada

<sup>3</sup>Department of Microbiology and Immunology, University of British Columbia, Vancouver, Canada

<sup>4</sup>Graduate Program in Bioinformatics, University of British Columbia, Canada, V6T 1Z3

<sup>5</sup>Present address: Department of Civil and Environmental Engineering, University of Wisconsin-Madison, Madison, USA

Running title: *Coalbed microbial communities*

†To whom correspondence should be addressed: Alberta Innovates – Technology Futures, Environment and Carbon Management Division 250 Karl Clark Road, Edmonton, AB Canada T6N 1E4, Office: (780) 450-5128, email:

[Karen.Budwill@albertainnovates.ca](mailto:Karen.Budwill@albertainnovates.ca)

## **SUPPLEMENTARY FIGURES, TABLES, AND FILES**

**Supplementary Figure 1** Rarefaction curves for coal samples collected using different sampling methods (cores, cuttings, drilling fluids). Horizontal axis shows number of reads sampled; vertical axis indicates accumulation of OTUs. Curves that became horizontal with increasing sequencing depth indicate that full sampling depth had been reached.

**Supplementary Figure 2** Bray-Curtis dissimilarities between coal samples (microbial communities) across all sampling locations based on non-metric multidimensional scaling (NMDS). Microbial communities partitioned by coal rank: sub-bituminous (blue), high volatile bituminous (orange), and volatile bituminous (green).

**Supplementary Figure 3** Distribution of indicator values and p-values for all OTUs in the dataset (A). Number of abundant, intermediate, and rare indicator OTUs for each indicator group (B).

**Supplementary Table 1** Sample information. Sample ID based on 4-digit identifier. First digit specifies drilling method used: coal core, CR; coal cutting, CT; drilling fluid, DF; or production waters, PW. Second digit specifies well number. Third digit specifies coal rank: high volatile bituminous, HB; volatile bituminous, VB; or subbituminous, SB. Fourth digit specifies sample depth.

**Supplementary Table 2** Sample diversity estimates for pyrotag datasets. Total OTU counts, Shannon and Simpson diversity metrics, and Chao1 richness estimates for each sample collected. Diversity metrics calculated from OTU table rarified to 1,050 reads. Shannon and Simpson indices consider both OTU (97% similarity cutoff) richness and evenness. Inverse Simpson indices are reported. Chao1 indices consider OTU richness.

**Supplementary Table 3** Metagenomic binning statistics. Genome completeness based on number of 107 single-copy TIGRFAM marker genes recovered. Genome contamination based on the number of single-copy TIGRFAM markers found in

duplicate.

**Supplementary Table 4** Aromatic compound degradation coding sequences annotated in the *Celeribacter* sp. population genome (Bin 1).

**Supplementary File 1** Bin 1 ORF annotations. ORF annotations based on best BLASTP hits (e-value E-6) against the RefSeq database.

**Supplementary File 2** (A) MetaCyc pathway table for *Paraccocus N5*, *S. mucosus*, *C. baekdonensis*, and Bin 1 (*Celeribacter* sp.) pathway/genome databases (PGDBs). (B) MetaCyc pathways and supporting reactions for Bin 1 (*Celeribacter* sp.) PGDB. Pathways were inferred using MetaPathways from annotated open reading frames and manual curation.

**Supplementary File 3** Variable genomic regions in Bin 1 population genome.

### A - Cores

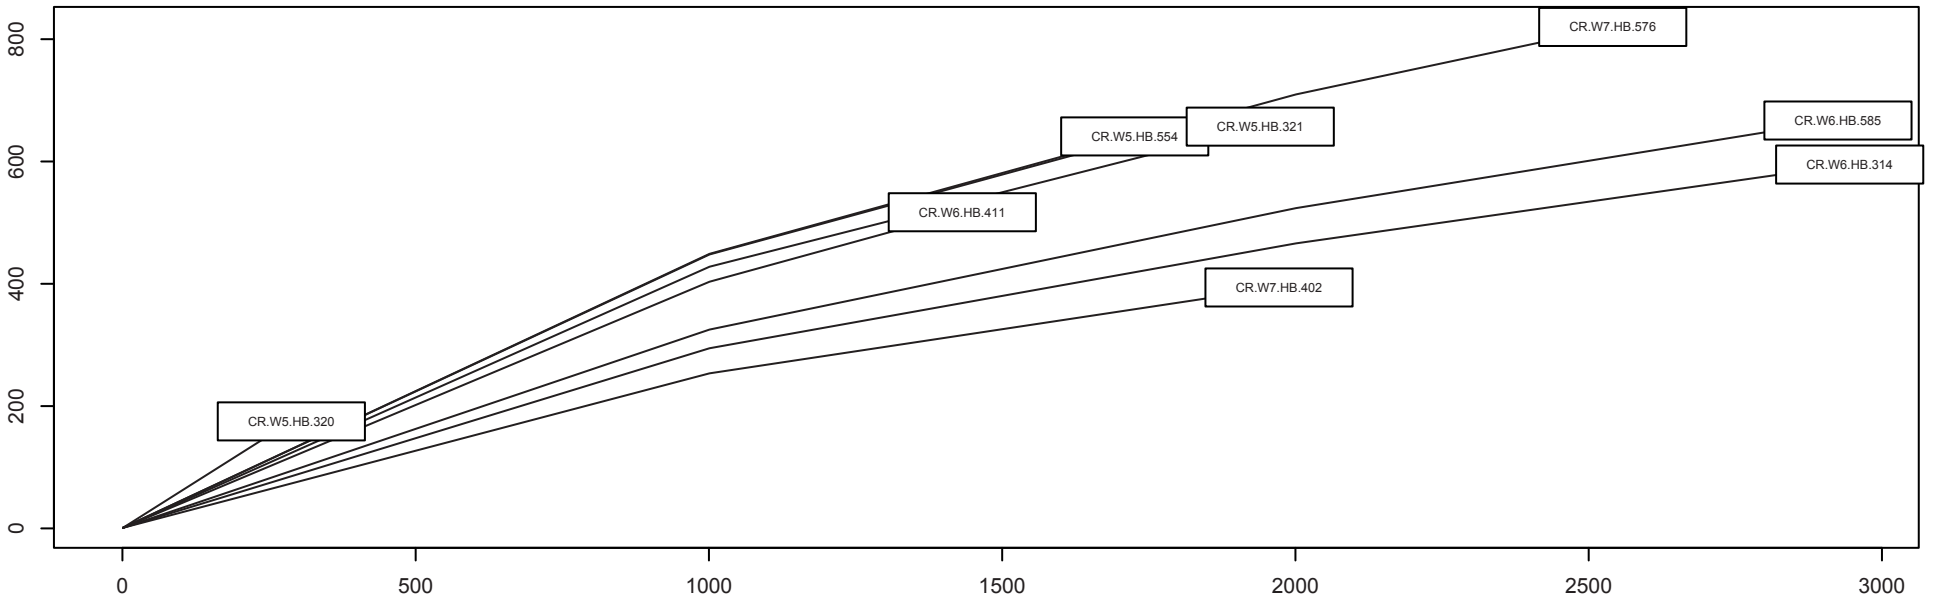

### B - Cuttings

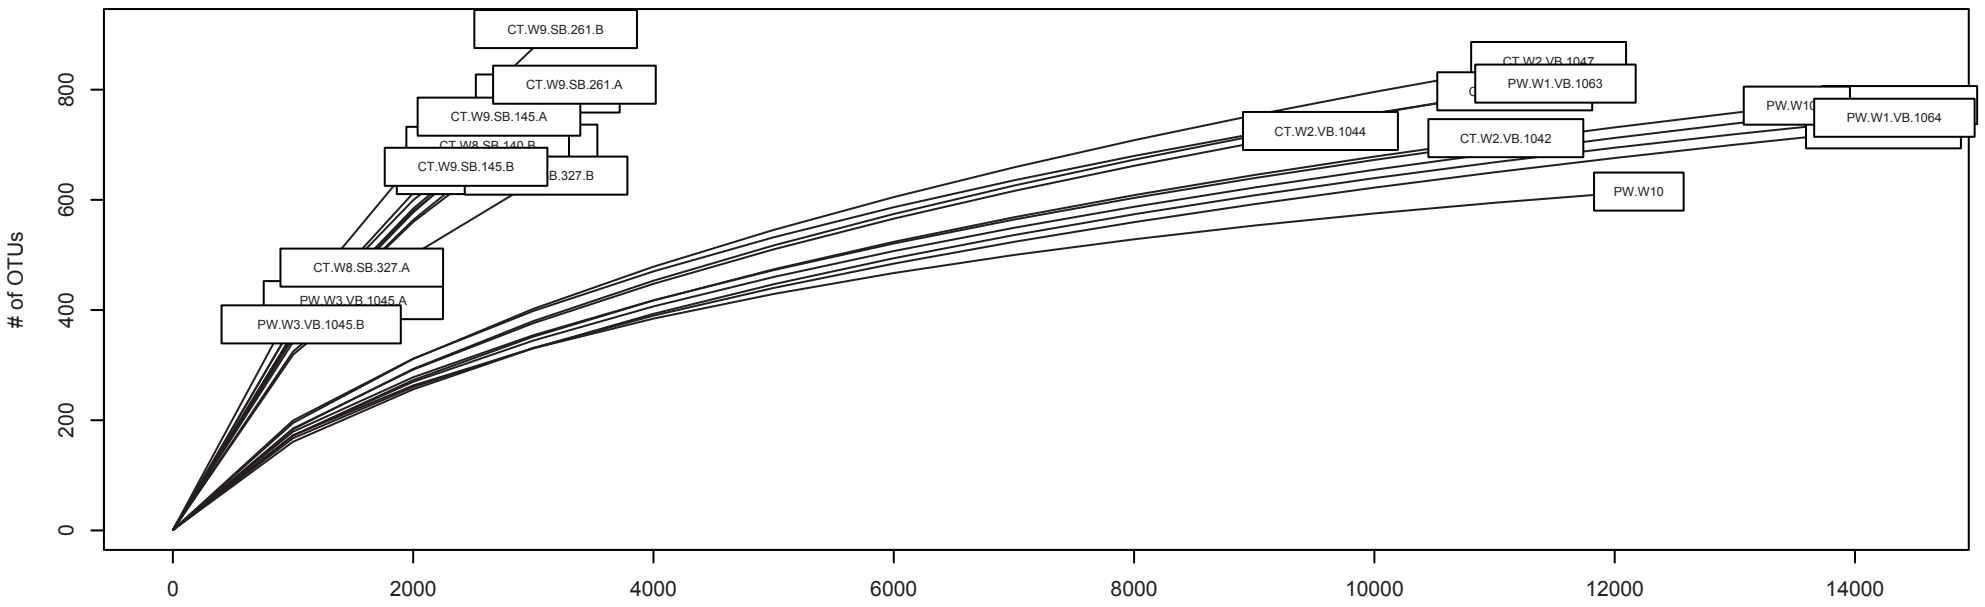

### C - Drilling Fluids

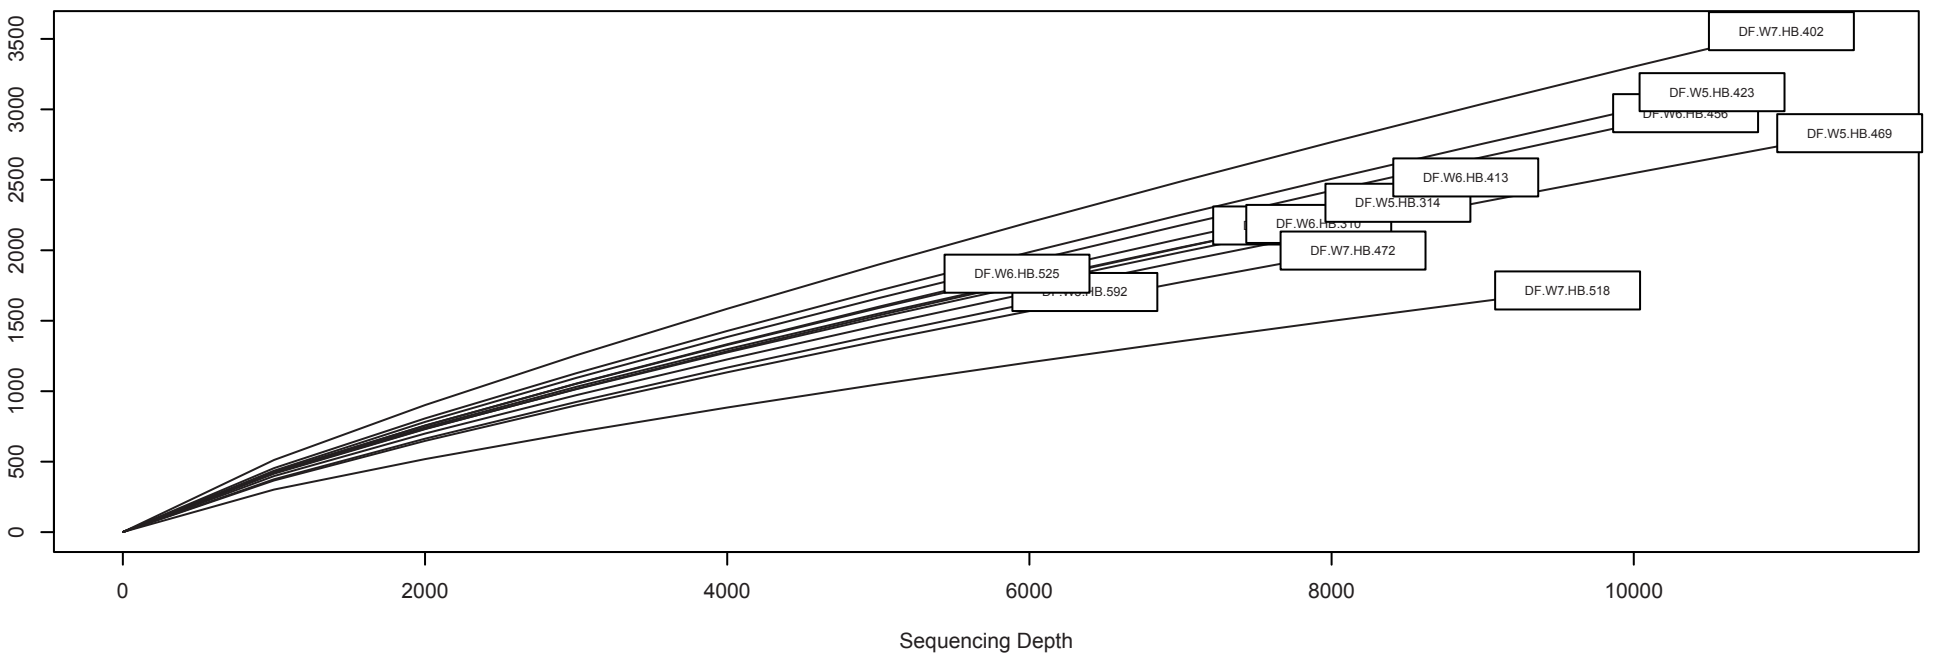

Supplementary Figure 1 Rarefaction curves for coal samples collected using different sampling methods (cores, cuttings, drilling fluids).

Supplementary Figure 2: NMDS/Bray - Stress = 0.127

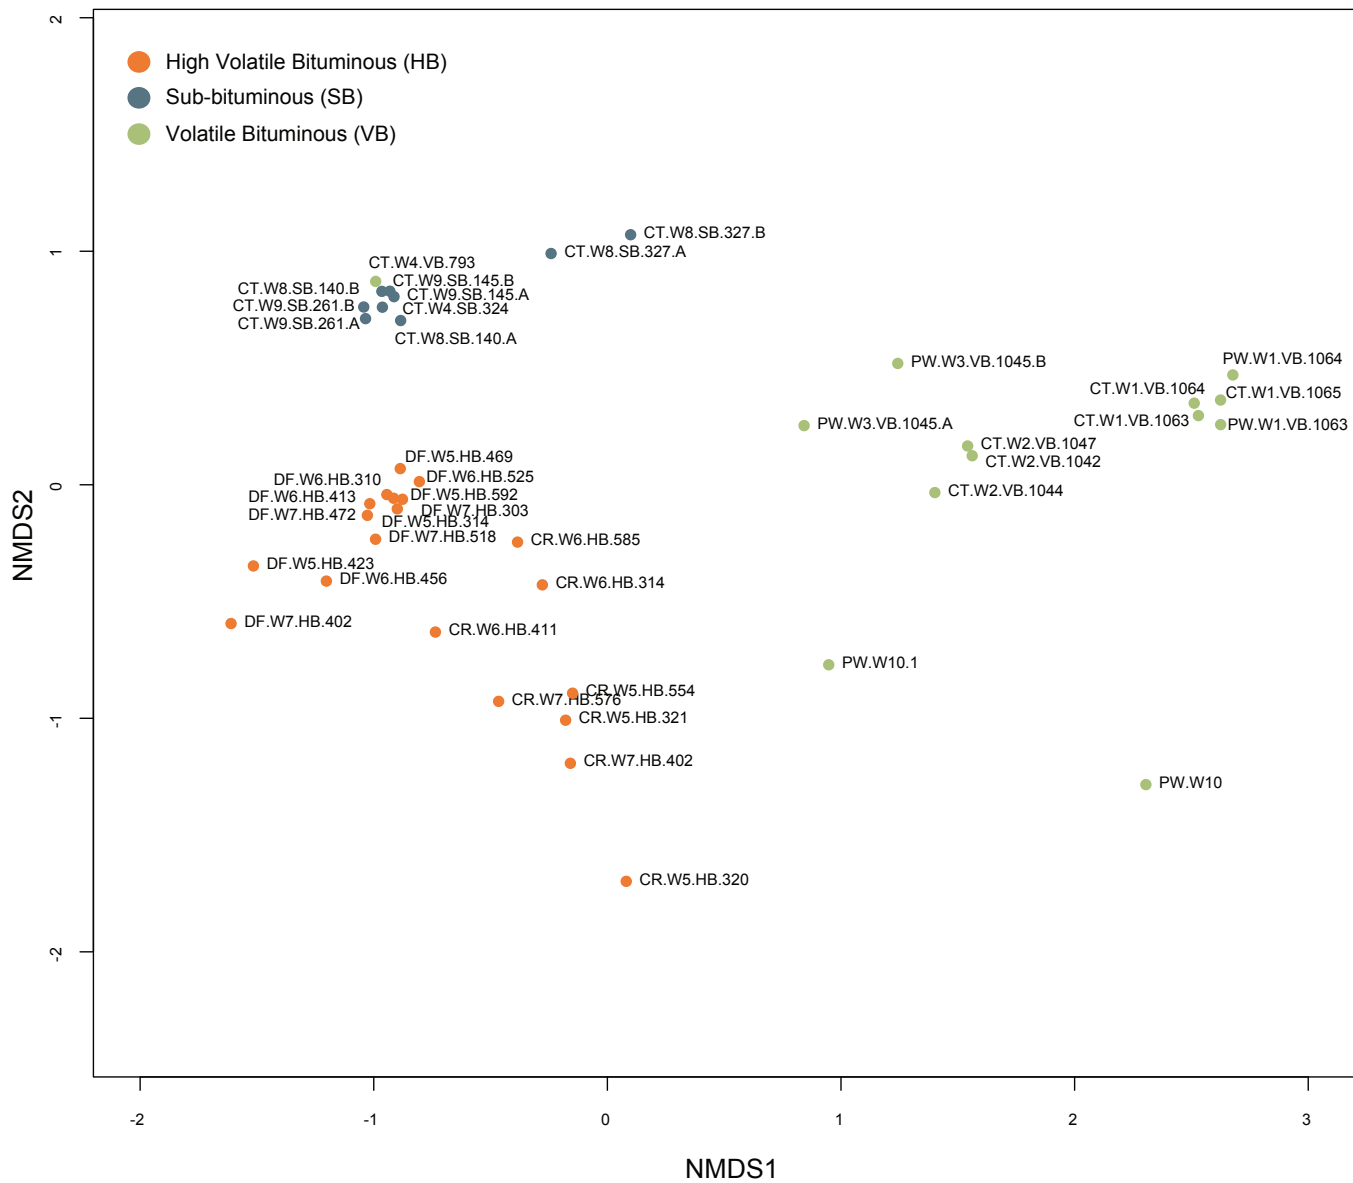

A - Distribution of Indicator Values

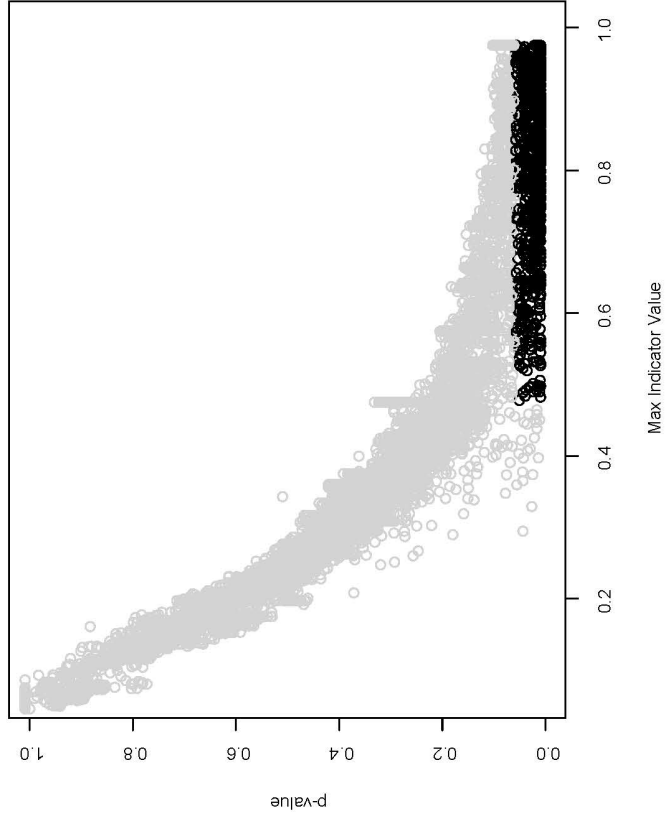

B - Distribution of Indicator OTUs

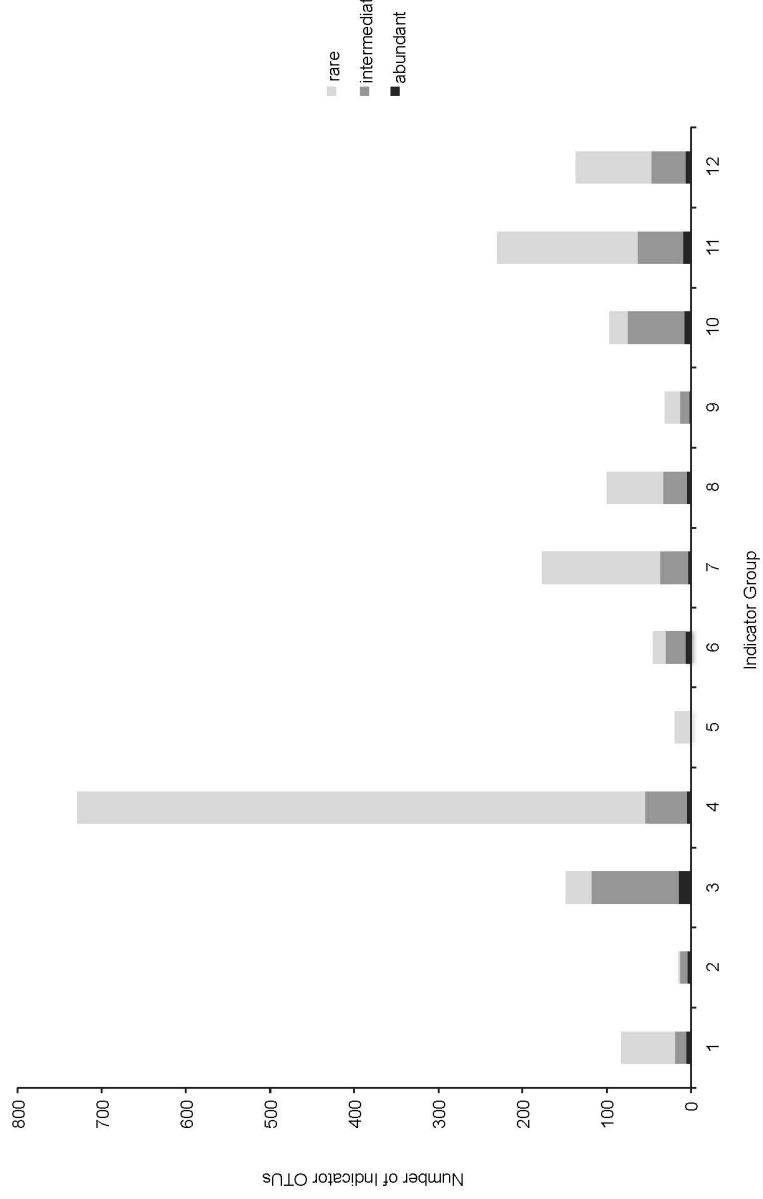

Supplementary Figure 3 Distribution of indicator values and p-values for all OTUs

**Table S1** Sample Information

| Sample ID                                     | Collection Method | Well No. | Coal Rank                  | Formation         | Total reads <sup>a</sup> | Pressure (kPa) | Temperature (°C) | Salinity (TDS) | Depth (m) |
|-----------------------------------------------|-------------------|----------|----------------------------|-------------------|--------------------------|----------------|------------------|----------------|-----------|
| <i>Cores</i>                                  |                   |          |                            |                   |                          |                |                  |                |           |
| CR-W5-HB-320                                  | Core              | 5        | High Volatile Bituminous C | Horseshoe Canyon  | 288                      | 2,500          | 22               | 2,000          | 320.70    |
| CR-W5-HB-321                                  | Core              | 5        | High Volatile Bituminous C | Horseshoe Canyon  | 1940                     | 2,500          | 22               | 2,000          | 321.96    |
| CR-W5-HB-554                                  | Core              | 5        | High Volatile Bituminous C | Horseshoe Canyon  | 1726                     | 2,500          | 22               | 2,000          | 544.50    |
| CR-W6-HB-314                                  | Core              | 6        | High Volatile Bituminous C | Horseshoe Canyon  | 2945                     | 2,500          | 22               | 2,000          | 314.60    |
| CR-W6-HB-411                                  | Core              | 6        | High Volatile Bituminous C | Horseshoe Canyon  | 1432                     | 2,500          | 22               | 2,000          | 411.60    |
| CR-W6-HB-585                                  | Core              | 6        | High Volatile Bituminous C | Horseshoe Canyon  | 2925                     | 2,500          | 22               | 2,000          | 585.00    |
| CR-W7-HB-402                                  | Core              | 7        | High Volatile Bituminous C | Horseshoe Canyon  | 1972                     | 2,500          | 22               | 2,000          | 402.00    |
| CR-W7-HB-576                                  | Core              | 7        | High Volatile Bituminous C | Horseshoe Canyon  | 2541                     | 2,500          | 22               | 2,000          | 576.26    |
| <i>Drilling Fluids (core-associated)</i>      |                   |          |                            |                   |                          |                |                  |                |           |
| DF-W5-HB-314                                  | Drilling Fluid    | 5        | High Volatile Bituminous C | Horseshoe Canyon  | 7311                     | 2,500          | 22               | 2,000          | 314       |
| DF-W5-HB-423                                  | Drilling Fluid    | 5        | High Volatile Bituminous C | Horseshoe Canyon  | 9038                     | 2,500          | 22               | 2,000          | 423       |
| DF-W5-HB-469                                  | Drilling Fluid    | 5        | High Volatile Bituminous C | Horseshoe Canyon  | 10056                    | 2,500          | 22               | 2,000          | 469       |
| DF-W5-HB-592                                  | Drilling Fluid    | 5        | High Volatile Bituminous C | Horseshoe Canyon  | 5503                     | 2,500          | 22               | 2,000          | 592       |
| DF-W6-HB-310                                  | Drilling Fluid    | 6        | High Volatile Bituminous C | Horseshoe Canyon  | 6841                     | 2,500          | 22               | 2,000          | 310       |
| DF-W6-HB-413                                  | Drilling Fluid    | 6        | High Volatile Bituminous C | Horseshoe Canyon  | 7669                     | 2,500          | 22               | 2,000          | 413       |
| DF-W6-HB-456                                  | Drilling Fluid    | 6        | High Volatile Bituminous C | Horseshoe Canyon  | 8903                     | 2,500          | 22               | 2,000          | 456       |
| DF-W6-HB-525                                  | Drilling Fluid    | 6        | High Volatile Bituminous C | Horseshoe Canyon  | 4972                     | 2,500          | 22               | 2,000          | 525       |
| DF-W7-HB-303                                  | Drilling Fluid    | 7        | High Volatile Bituminous C | Horseshoe Canyon  | 6623                     | 2,500          | 22               | 2,000          | 303       |
| DF-W7-HB-402                                  | Drilling Fluid    | 7        | High Volatile Bituminous C | Horseshoe Canyon  | 9351                     | 2,500          | 22               | 2,000          | 402       |
| DF-W7-HB-472                                  | Drilling Fluid    | 7        | High Volatile Bituminous C | Horseshoe Canyon  | 7134                     | 2,500          | 22               | 2,000          | 472       |
| DF-W7-HB-518                                  | Drilling Fluid    | 7        | High Volatile Bituminous C | Horseshoe Canyon  | 8759                     | 2,500          | 22               | 2,000          | 518       |
| <i>Cuttings</i>                               |                   |          |                            |                   |                          |                |                  |                |           |
| CT-W1-VB-1063                                 | Cutting           | 1        | Volatile Bituminous A or B | Upper Mannville   | 11168                    | 10,150         | 35-40            | 60,000         | 1063      |
| CT-W1-VB-1064                                 | Cutting           | 1        | Volatile Bituminous A or B | Upper Mannville   | 14372                    | 10,150         | 35-40            | 60,000         | 1,064.40  |
| CT-W1-VB-1065                                 | Cutting           | 1        | Volatile Bituminous A or B | Upper Mannville   | 14237                    | 10,150         | 35-40            | 60,000         | 1,065.70  |
| CT-W2-VB-1042                                 | Cutting           | 2        | Volatile Bituminous A or B | Upper Mannville   | 11094                    | 10,150         | 32-35            | 60,000         | 1,042.30  |
| CT-W2-VB-1044                                 | Cutting           | 2        | Volatile Bituminous A or B | Upper Mannville   | 9551                     | 10,150         | 32-35            | 60,000         | 1,044.90  |
| CT-W2-VB-1047                                 | Cutting           | 2        | Volatile Bituminous A or B | Upper Mannville   | 11450                    | 10,150         | 32-35            | 60,000         | 1,047.10  |
| CT-W4-VB-793                                  | Cutting           | 4        | Volatile Bituminous A or B | Horseshoe Canyon  | 3106                     | 1,000          | 22               | 10,000         | 793       |
| CT-W4-SB-324                                  | Cutting           | 4        | Sub-bituminous             | Scollard (Ardley) | 1572                     | 1,000          | 22               | 2,000          | 324       |
| CT-W8-SB-140.A                                | Cutting           | 8        | Sub-bituminous             | Horseshoe Canyon  | 3120                     | 1,000          | 20               | 1,000          | 140       |
| CT-W8-SB-140.B                                | Cutting           | 8        | Sub-bituminous             | Belly River       | 2462                     | 1,000          | 20               | 1,000          | 140       |
| CT-W8-SB-327.A                                | Cutting           | 8        | Sub-bituminous             | Belly River       | 2856                     | 1,500          | 20               | 1,000          | 327       |
| CT-W8-SB-327.B                                | Cutting           | 8        | Sub-bituminous             | Belly River       | 2620                     | 4,500          | 20               | 1,000          | 327       |
| CT-W9-SB-145.A                                | Cutting           | 9        | Sub-bituminous             | Belly River       | 2714                     | 1,000          | 20               | 1,000          | 145       |
| CT-W9-SB-145.B                                | Cutting           | 9        | Sub-bituminous             | Belly River       | 2440                     | 1,000          | 20               | 1,000          | 145       |
| CT-W9-SB-261.A                                | Cutting           | 9        | Sub-bituminous             | Belly River       | 3342                     | 1,000          | 20               | 1,000          | 261       |
| CT-W9-SB-261.B                                | Cutting           | 9        | Sub-bituminous             | Belly River       | 3186                     | 1,000          | 20               | 1,000          | 261       |
| <i>Production Waters (cutting-associated)</i> |                   |          |                            |                   |                          |                |                  |                |           |
| PW-W1-VB-1063                                 | Production Water  | 1        | Volatile Bituminous A or B | Upper Mannville   | 11507                    | 10,150         | 35-40            | 60,000         | 1,063     |
| PW-W1-VB-1064                                 | Production Water  | 1        | Volatile Bituminous A or B | Upper Mannville   | 14328                    | 10,150         | 35-40            | 60,000         | 1,064.40  |
| PW-W3-VB-1045.A                               | Production Water  | 3        | Volatile Bituminous A or B | Upper Mannville   | 1504                     | 9,000-10,000   | 41               | 50,000-60,000  | 1,045.50  |
| PW-W3-VB-1045.B                               | Production Water  | 3        | Volatile Bituminous A or B | Upper Mannville   | 1151                     | 9,000-10,000   | 41               | 50,000-60,001  | 1,045.50  |
| PW-W10-VB.A                                   | Production Water  | 10       | Volatile Bituminous A or B | Upper Mannville   | 12201                    | -              | -                | -              | -         |
| PW-W10-VB.B                                   | Production Water  | 10       | Volatile Bituminous A or B | Upper Mannville   | 13516                    | -              | -                | -              | -         |

<sup>a</sup>Singletons removed

**Table S2** Sample Diversity Estimates

| Sample                   | Total OTUs | Rarified OTUs | Shannon | Simpson | Chao1 |
|--------------------------|------------|---------------|---------|---------|-------|
| <i>Cores</i>             |            |               |         |         |       |
| CR-W5-HB-554             | 641        | 501           | 5.49    | 78.13   | 1207  |
| CR-W7-HB-576             | 820        | 508           | 5.37    | 58.00   | 1421  |
| CR-W5-HB-321             | 657        | 473           | 5.28    | 59.16   | 1018  |
| CR-W6-HB-411             | 517        | 450           | 5.25    | 66.07   | 1208  |
| CR-W6-HB-585             | 667        | 365           | 4.64    | 30.73   | 1228  |
| CR-W6-HB-314             | 595        | 310           | 4.16    | 12.05   | 792   |
| CR-W7-HB-402             | 394        | 275           | 3.96    | 12.93   | 687   |
| CR-W5-HB-320*            | 175        | -             | -       | -       | -     |
| <i>Drilling fluids</i>   |            |               |         |         |       |
| DF-W6-HB-456             | 1785       | 456           | 5.20    | 59.01   | 1559  |
| DF-W7-HB-402             | 1257       | 357           | 4.49    | 25.88   | 1032  |
| DF-W7-HB-472             | 1533       | 380           | 4.48    | 20.35   | 1193  |
| DF-W6-HB-310             | 1085       | 334           | 4.32    | 17.71   | 943   |
| DF-W6-HB-525             | 891        | 342           | 4.32    | 18.85   | 1088  |
| DF-W5-HB-314             | 1189       | 344           | 4.25    | 17.42   | 1001  |
| DF-W7-HB-303             | 984        | 285           | 4.20    | 18.17   | 893   |
| DF-W6-HB-413             | 1418       | 323           | 4.17    | 13.11   | 914   |
| DF-W5-HB-592             | 790        | 282           | 4.06    | 17.21   | 805   |
| DF-W5-HB-469             | 1470       | 361           | 3.79    | 5.97    | 1237  |
| DF-W7-HB-518             | 916        | 248           | 3.77    | 14.07   | 678   |
| DF-W5-HB-423             | 989        | 294           | 3.75    | 9.54    | 1017  |
| <i>Cuttings</i>          |            |               |         |         |       |
| CT-W9-SB-261.B           | 910        | 451           | 5.03    | 39.59   | 1364  |
| CT-W8-SB-140.A           | 702        | 413           | 4.85    | 29.62   | 1020  |
| CT-W9-SB-261.A           | 809        | 394           | 4.79    | 32.08   | 1325  |
| CT-W4-SB-324             | 793        | 393           | 4.78    | 28.04   | 1021  |
| CT-W8-SB-140.B           | 698        | 399           | 4.77    | 27.53   | 1179  |
| CT-W9-SB-145.A           | 751        | 411           | 4.73    | 25.74   | 1096  |
| CT-W8-SB-327.B           | 644        | 389           | 4.66    | 22.27   | 1151  |
| CT-W8-SB-327.A           | 477        | 365           | 4.62    | 22.35   | 853   |
| CT-W9-SB-145.B           | 660        | 394           | 4.55    | 20.98   | 1122  |
| CT-W4-VB-793             | 645        | 357           | 4.37    | 17.51   | 874   |
| CT-W1-VB-1063            | 797        | 220           | 3.52    | 10.61   | 595   |
| CT-W2-VB-1047            | 852        | 210           | 3.31    | 8.70    | 626   |
| CT-W1-VB-1064            | 772        | 192           | 3.24    | 9.96    | 665   |
| CT-W2-VB-1044            | 725        | 202           | 3.18    | 6.59    | 571   |
| CT-W1-VB-1065            | 728        | 182           | 3.17    | 8.89    | 522   |
| CT-W2-VB-1042            | 712        | 185           | 3.15    | 8.60    | 450   |
| <i>Production Waters</i> |            |               |         |         |       |
| PW-W3-VB-1045.B          | 771        | 373           | 4.70    | 25.94   | 735   |
| PW-W3-VB-1045.A          | 615        | 349           | 4.38    | 14.29   | 739   |
| PW-W1-VB-1063            | 811        | 206           | 3.34    | 10.72   | 656   |
| PW-W10-VB.A              | 418        | 185           | 3.18    | 6.22    | 461   |
| PW-W1-VB-1064            | 749        | 199           | 3.17    | 8.79    | 542   |
| PW-W10-VB.B              | 374        | 224           | 3.07    | 4.34    | 494   |

Notes: Diversity metrics calculated from OTU table rarified to 1,050 reads. \*Sample contained <1,050 reads



**Table S3** MaxBin Summary and Marker Predictions

| <b>Bin Statistics</b>                                                                              |                                                  | <b>Bin001</b>            | <b>Bin002</b> |
|----------------------------------------------------------------------------------------------------|--------------------------------------------------|--------------------------|---------------|
|                                                                                                    | Coverage                                         | 17.53                    | 3.84          |
|                                                                                                    | Genome completeness                              | 99%                      | 63%           |
|                                                                                                    | Genome contamination                             | 8%                       | 33%           |
|                                                                                                    | Genome size                                      | 4,691,774 bp             | 2,943,087 bp  |
|                                                                                                    | GC content                                       | 60%                      | 50%           |
|                                                                                                    | Predicted ORFs                                   | 4755                     | 3812          |
|                                                                                                    | Total marker                                     | 115                      | 89            |
|                                                                                                    | Unique marker                                    | 106                      | 67            |
| Taxonomic classification, sister lineage (PhyloSift) <i>C. baekdonensis</i> <i>A. dehalogenens</i> |                                                  |                          |               |
| <i>TIGRFAM</i> Accession                                                                           | Product                                          | <i>Single-copy genes</i> |               |
| PGK                                                                                                | N/A                                              | 1                        | 1             |
| Ribosomal_L23                                                                                      | ribosomal protein L23                            | 1                        | -             |
| Ribosomal_L5                                                                                       | ribosomal protein L5                             | 1                        | 2             |
| Ribosomal_L3                                                                                       | ribosomal protein L3                             | 1                        | -             |
| Ribosomal_L6                                                                                       | ribosomal protein L6                             | 2                        | -             |
| Ribosomal_S17                                                                                      | ribosomal protein S17                            | 1                        | 3             |
| Ribosomal_S9                                                                                       | ribosomal protein S9                             | 1                        | 1             |
| Ribosomal_S8                                                                                       | ribosomal protein S8                             | 1                        | 1             |
| Ribosomal_S11                                                                                      | ribosomal protein S11                            | 2                        | 1             |
| Ribosomal_S13                                                                                      | ribosomal protein S13                            | 1                        | 2             |
| Ribosomal_L10                                                                                      | ribosomal protein L10                            | 1                        | 1             |
| Ribosomal_L4                                                                                       | ribosomal protein L4                             | 1                        | -             |
| tRNA-synt_1d                                                                                       | tRNA synthetases class I                         | 1                        | 1             |
| GrpE                                                                                               | protein GrpE                                     | 1                        | 1             |
| Methyltransf_5                                                                                     | methyltransferase                                | 1                        | 2             |
| TIGR00001                                                                                          | ribosomal protein L35                            | 1                        | 1             |
| TIGR00002                                                                                          | ribosomal protein S16                            | 2                        | 1             |
| TIGR00009                                                                                          | ribosomal protein L28                            | 1                        | -             |
| TIGR00012                                                                                          | ribosomal protein L29                            | 1                        | 3             |
| TIGR00019                                                                                          | peptide chain release factor 1                   | 1                        | -             |
| TIGR00029                                                                                          | ribosomal protein S20                            | 1                        | -             |
| TIGR00043                                                                                          | probable rRNA maturation factor YbeY             | 1                        | 3             |
| TIGR00059                                                                                          | ribosomal protein L17                            | 1                        | 3             |
| TIGR00060                                                                                          | ribosomal protein L18                            | 1                        | -             |
| TIGR00061                                                                                          | ribosomal protein L21                            | 1                        | -             |
| TIGR00062                                                                                          | ribosomal protein L27                            | 1                        | -             |
| TIGR00064                                                                                          | signal recognition particle-docking protein FtsY | 1                        | 1             |
| TIGR00082                                                                                          | ribosome-binding factor A                        | 1                        | -             |
| TIGR00086                                                                                          | SsrA-binding protein                             | 1                        | -             |
| TIGR00092                                                                                          | GTP-binding protein YchF                         | 2                        | 1             |
| TIGR00115                                                                                          | trigger factor                                   | 1                        | 1             |
| TIGR00116                                                                                          | translation elongation factor Ts                 | 1                        | -             |
| TIGR00152                                                                                          | dephospho-CoA kinase                             | 1                        | -             |
| TIGR00158                                                                                          | ribosomal protein L9                             | 1                        | 1             |
| TIGR00165                                                                                          | ribosomal protein S18                            | 1                        | 1             |
| TIGR00166                                                                                          | ribosomal protein S6                             | 1                        | 1             |
| TIGR00168                                                                                          | translation initiation factor IF-3               | 1                        | -             |
| TIGR00234                                                                                          | tyrosine--tRNA ligase                            | 1                        | 1             |

|           |                                                              |   |   |
|-----------|--------------------------------------------------------------|---|---|
| TIGR00337 | CTP synthase                                                 | 1 | - |
| TIGR00344 | alanine--tRNA ligase                                         | 1 | 1 |
| TIGR00362 | chromosomal replication initiator protein DnaA               | 1 | 1 |
| TIGR00389 | glycine--tRNA ligase                                         | 1 | - |
| TIGR00392 | isoleucine--tRNA ligase                                      | 1 | 1 |
| TIGR00396 | leucine--tRNA ligase                                         | 1 | 1 |
| TIGR00409 | proline--tRNA ligase                                         |   | - |
| TIGR00414 | serine--tRNA ligase                                          | 1 | 1 |
| TIGR00418 | threonine--tRNA ligase                                       | 1 | 1 |
| TIGR00420 | tRNA (5-methylaminomethyl-2-thiouridylate)-methyltransferase | 1 | 1 |
| TIGR00422 | valine--tRNA ligase                                          | 2 | 1 |
| TIGR00435 | cysteine--tRNA ligase                                        | 1 | - |
| TIGR00436 | GTP-binding protein Era                                      | 1 | - |
| TIGR00442 | histidine--tRNA ligase                                       | 1 | 1 |
| TIGR00459 | aspartate--tRNA ligase                                       | 1 | 1 |
| TIGR00460 | methionyl-tRNA formyltransferase                             | 1 | 1 |
| TIGR00468 | phenylalanine--tRNA ligase, alpha subunit                    | 1 | 1 |
| TIGR00472 | phenylalanine--tRNA ligase, beta subunit                     | 1 | 1 |
| TIGR00487 | translation initiation factor IF-2                           | 1 | - |
| TIGR00496 | ribosome recycling factor                                    | 1 | - |
| TIGR00575 | DNA ligase, NAD-dependent                                    | 1 | 1 |
| TIGR00631 | excinuclease ABC subunit B                                   | 1 | 1 |
| TIGR00663 | DNA polymerase III, beta subunit                             | 1 | 1 |
| TIGR00755 | ribosomal RNA small subunit methyltransferase A              | 1 | 1 |
| TIGR00810 | preprotein translocase, SecG subunit                         | 1 | - |
| TIGR00855 | ribosomal protein L7/L12                                     | 1 | 1 |
| TIGR00922 | transcription termination/antitermination factor NusG        | 2 | - |
| TIGR00952 | ribosomal protein S15                                        | 1 | - |
| TIGR00959 | signal recognition particle protein                          | 2 | 1 |
| TIGR00963 | preprotein translocase, SecA subunit                         | 1 | - |
| TIGR00964 | preprotein translocase, SecE subunit                         | 2 | - |
| TIGR00967 | preprotein translocase, SecY subunit                         | 1 | 1 |
| TIGR00981 | ribosomal protein S12                                        | 1 | 1 |
| TIGR01009 | ribosomal protein S3                                         | 1 | 2 |
| TIGR01011 | ribosomal protein S2                                         | 1 | 1 |
| TIGR01017 | ribosomal protein S4                                         | 2 | 1 |
| TIGR01021 | ribosomal protein S5                                         | 1 | - |
| TIGR01024 | ribosomal protein L19                                        | 1 | - |
| TIGR01029 | ribosomal protein S7                                         | 1 | 2 |
| TIGR01030 | ribosomal protein L34                                        | 1 | - |
| TIGR01031 | ribosomal protein L32                                        | 1 | 1 |
| TIGR01032 | ribosomal protein L20                                        | 1 | 1 |
| TIGR01044 | ribosomal protein L22                                        | 1 | 2 |
| TIGR01049 | ribosomal protein S10                                        | 1 | - |
| TIGR01050 | ribosomal protein S19                                        | 1 | 2 |
| TIGR01059 | DNA gyrase, B subunit                                        | 1 | - |
| TIGR01063 | DNA gyrase, A subunit                                        | 1 | - |
| TIGR01066 | ribosomal protein L13                                        | 1 | 1 |
| TIGR01067 | ribosomal protein L14                                        | 1 | 3 |
| TIGR01071 | ribosomal protein L15                                        | 1 | 1 |
| TIGR01079 | ribosomal protein L24                                        | 1 | 1 |

|           |                                            |   |   |
|-----------|--------------------------------------------|---|---|
| TIGR01164 | ribosomal protein L16                      | 1 | 3 |
| TIGR01169 | ribosomal protein L1                       | 1 | 1 |
| TIGR01171 | ribosomal protein L2                       | 1 | 1 |
| TIGR01391 | DNA primase                                | 1 | 3 |
| TIGR01393 | elongation factor 4                        | 1 | 1 |
| TIGR01632 | ribosomal protein L11                      | 1 | 1 |
| TIGR01953 | transcription termination factor NusA      | 1 | - |
| TIGR02012 | protein RecA                               | 1 | - |
| TIGR02013 | DNA-directed RNA polymerase, beta subunit  | 1 | 1 |
| TIGR02027 | DNA-directed RNA polymerase, alpha subunit | 1 | 1 |
| TIGR02191 | ribonuclease III                           | 1 | - |
| TIGR02350 | chaperone protein DnaK                     | 1 | 1 |
| TIGR02387 | DNA-directed RNA polymerase, gamma subunit | 1 | - |
| TIGR02397 | DNA polymerase III, subunit gamma and tau  | 1 | - |
| TIGR02432 | tRNA(Ile)-lysidine synthetase              | 1 | - |
| TIGR02729 | Obg family GTPase CgtA                     | 1 | 1 |
| TIGR03263 | guanylate kinase                           | 1 | - |
| TIGR03594 | ribosome-associated GTPase EngA            | 1 | 2 |

---

## Eugenol Degradation

| Locus Tag | Gene Annotation |
|-----------|-----------------|
|-----------|-----------------|

|         |                                  |
|---------|----------------------------------|
| missing | Eugenol hydroxylase              |
| 29_19   | coniferyl aldehyde dehydrogenase |

## Ferulic Acid Degradation

| Locus Tag | Gene Annotation |
|-----------|-----------------|
|-----------|-----------------|

|      |                         |
|------|-------------------------|
| 5_29 | feruloyl-CoA synthetase |
| 5_24 | enoyl-CoA hydratase     |
| 74_6 | 3-ketoacyl-CoA thiolase |

## Vanillin and Vanillate Degradation I

| Locus Tag | Gene Annotation |
|-----------|-----------------|
|-----------|-----------------|

|         |                        |
|---------|------------------------|
| missing | vanillin dehydrogenase |
|---------|------------------------|

## Vanillate

| Locus Tag | Gene Annotation |
|-----------|-----------------|
|-----------|-----------------|

|      |                                         |
|------|-----------------------------------------|
| 8_28 | vanillate O-demethylase oxidoreductase  |
| 8_29 | 3-oxoacyl-ACP reductase                 |
| 8_30 | aromatic-ring-hydroxylating dioxygenase |

## Protocatechuate Degradation II (ortho-cleavage pathway)

| Locus Tag | Gene Annotation |
|-----------|-----------------|
|-----------|-----------------|

|       |                                                            |
|-------|------------------------------------------------------------|
| 0_83  | putative protein, gamma-carboxymuconolactone decarboxylase |
| 17_16 | putative carboxymuconolactone decarboxylase family protein |
| 67_12 | carboxymuconolactone decarboxylase                         |
| 0_47  | 4-carboxymuconolactone decarboxylase                       |
| 5_30  | amidohydrolase                                             |
| 5_31  | acyl-CoA dehydrogenase                                     |
| 5_32  | transcriptional regulator                                  |
| 5_33  | 4-hydroxybenzoate 3-monooxygenase                          |
| 5_34  | 3-carboxy-cis,cis-muconate cycloisomerase                  |
| 5_35  | protocatechuate 3,4-dioxygenase subunit alpha              |
| 5_36  | protocatechuate 3,4-dioxygenase subunit beta               |
| 5_37  | 4-carboxymuconolactone decarboxylase                       |
| 5_38  | 3-oxoadipate enol-lactonase                                |

## Benzoate Degradation I (aerobic)

| Locus Tag | Gene Annotation |
|-----------|-----------------|
|-----------|-----------------|

|       |                                                              |
|-------|--------------------------------------------------------------|
| 13_57 | 1,6-dihydroxycyclohexa-2,4-diene-1-carboxylate dehydrogenase |
| 13_58 | 2-chlorobenzoate 1,2-dioxygenase, electron transfer subunit  |

|       |                                        |
|-------|----------------------------------------|
| 13_59 | benzoate 1,2-dioxygenase subunit beta  |
| 13_60 | benzoate 1,2-dioxygenase subunit alpha |

### Catechol Degradation to 2-oxopent-4-enoate I

| Locus Tag | Gene Annotation                              |
|-----------|----------------------------------------------|
| 108_4     | metapyrocatechase (catechol 2,3-dioxygenase) |
| 38_16     | alpha/beta hydrolase                         |
| 38_17     | paraquat-inducible protein A                 |
| 38_18     | paraquat-inducible protein B                 |
| 38_19     | paraquat-inducible protein B                 |
| 38_20     | hypothetical protein                         |
| 38_21     | alkyl hydroperoxide reductase                |
| 38_22     | hypothetical protein                         |
| 38_23     | catechol 2,3 dioxygenase                     |
| 38_24     | ATP:cob(I)alamin adenosyltransferase         |
| 38_25     | 2-hydroxymuconic semialdehyde dehydrogenase  |
| 38_26     | 2-oxopent-4-enoate hydratase                 |
| 38_27     | acetaldehyde dehydrogenase                   |
| 38_28     | 4-hydroxy-2-oxovalerate aldolase             |
| 38_29     | 4-oxalocrotonate decarboxylase               |
| 38_30     | oxalocrotonate tautomerase                   |
| 38_31     | antibiotic biosynthesis monooxygenase        |
| 38_32     | GntR family transcriptional regulator        |
| 38_33     | ArsR family transcriptional regulator        |
| 62_5      | catechol 2,3 dioxygenase                     |

### Anthranilate Degradation II (aerobic)

| Locus Tag | Gene Annotation                  |
|-----------|----------------------------------|
| 27_10     | 2-aminobenzoate-CoA ligase       |
| missing   | 2-aminobenzoyl-CoA monooxygenase |

### 2-amino-3-carboxymuconate semialdehyde Degradation to 2-oxopentenoate

| Locus Tag | Gene Annotation                                                 |
|-----------|-----------------------------------------------------------------|
| 38_25     | 2-hydroxymuconic semialdehyde dehydrogenase                     |
| 38_29     | 4-oxalocrotonate decarboxylase                                  |
| 74_3      | putative 2-amino-3-carboxymuconate-6-semialdehyde decarboxylase |

### Gentisate Degradation I

| Locus Tag | Gene Annotation           |
|-----------|---------------------------|
| 5_14      | maleylpyruvate isomerase  |
| 5_15      | gentisate 1,2-dioxygenase |
| 59_18     | gentisate 1,2-dioxygenase |

|      |                                 |
|------|---------------------------------|
| 5_16 | maleylacetoacetate isomerase    |
| 5_17 | fumarylacetoacetate hydrolase   |
| 5_18 | 3-hydroxybenzoate 6-hydroxylase |

### Salicylate Degradation I

| Locus Tag | Gene Annotation            |
|-----------|----------------------------|
| 36_1      | Salicylate hydroxylase     |
| 39_8      | salicylate 1-monooxygenase |
| 84_9      | salicylate 1-monooxygenase |

### Phenylacetate Degradation I (aerobic)

| Locus Tag | Gene Annotation                                        |
|-----------|--------------------------------------------------------|
| 298_0     | putative phenylacetate-coenzyme A ligase               |
| 459_0     | phenylacetyl-CoA ligase (phenylacetic acid catabolism) |
| 74_5      | aromatic compound degradation protein PaaI             |
| 74_6      | 3-ketoacyl-CoA thiolase                                |
| 68_1      | PaaX family transcriptional regulator                  |
| 68_2      | acetyl-CoA acetyltransferase                           |
| 68_3      | phenylacetate-CoA oxygenase subunit PaaA               |
| 68_4      | phenylacetate-CoA oxygenase subunit PaaB               |
| 68_5      | phenylacetate-CoA oxygenase, PaaI subunit              |
| 68_6      | phenylacetate-CoA oxygenase, PaaJ subunit              |
| 68_7      | phenylacetate-CoA oxygenase/reductase, PaaK subunit    |
| 68_8      | enoyl-CoA hydratase                                    |
| 68_9      | phenylacetic acid degradation protein PaaY             |
| 68_10     | TetR family transcriptional regulator                  |
| 68_11     | phenylacetate-CoA ligase                               |
| 68_12     | phenylacetic acid degradation protein PaaD             |
| 68_13     | enoyl-CoA hydratase                                    |
| 68_14     | phenylacetic acid degradation protein K                |
| 68_15     | ABC transporter substrate-binding protein              |
| 68_16     | ABC transporter permease                               |

### Biphenyl Degradation

| Locus Tag | Gene Annotation                             |
|-----------|---------------------------------------------|
| 102_0     | biphenyl 2,3-dioxygenase                    |
| 67_7      | biphenyl 2,3-dioxygenase                    |
| 67_8      | 3-(3-hydroxyphenyl)propionate hydroxylase   |
| 67_9      | 3-(3-hydroxyphenyl)propionate hydroxylase   |
| 67_10     | 5-carboxymethyl-2-hydroxymuconate isomerase |
| 67_11     | transcriptional regulator                   |
| 67_12     | carboxymuconolactone decarboxylase          |

67\_13     Glutathione S-transferase  
67\_14     hypothetical protein  
67\_15     phage integrase

### 3-oxoadipate Degradation

| Locus Tag | Gene Annotation                        |
|-----------|----------------------------------------|
| 68_2      | beta-ketoadipyl CoA thiolase           |
| 5_40      | acetyl-CoA acetyltransferase           |
| 5_41      | 3-oxoadipate CoA-transferase subunit B |
| 5_42      | 3-oxoadipate CoA-transferase subunit A |

### 2-oxopentenoate Degradation

| Locus Tag | Gene Annotation                                                |
|-----------|----------------------------------------------------------------|
| 108_1     | 4-hydroxy-2-oxovalerate/4-hydroxy-2-oxopentanoic acid aldolase |
| 108_2     | acetaldehyde dehydrogenase                                     |
| 108_3     | 2-keto-4-pentenoate hydratase                                  |
| 108_4     | putative 3,4-dihydroxyphenylacetate 2,3-dioxygenase            |
| 108_5     | monooxygenase                                                  |
| 108_6     | 2-hydroxy-6-oxo-6-phenylhexa-2,4-dienoate hydrolase            |
| 38_28     | putative 4-hydroxy-2-oxovalerate aldolase                      |
| 4_60      | acetaldehyde dehydrogenase 2                                   |
| 121_3     | 2-keto-4-pentenoate hydratase                                  |
| 246_0     | 4-hydroxy 2-oxovalerate aldolase                               |
